# Supplementary material
Source: PubMed Central journal article supplement (PMC5159488)

Coordinated Activities of Multiple Myc-Dependent and Myc-Independent Biosynthetic Pathways in Hepatoblastoma

Huabo Wang<sup>1</sup>, Jie Lu<sup>1</sup>, Lia R. Edmunds<sup>1</sup>, Sucheta Kulkarni<sup>1</sup>, James Dolezal<sup>1</sup>, Junyan Tao<sup>2</sup>, Sarangarajan Ranganathan<sup>3</sup>, Laura Jackson<sup>4</sup>, Marc Fromherz<sup>1</sup>, Donna Beer Stolz<sup>5</sup>, Radha Uppala<sup>6</sup>, Sivakama Bharathi<sup>6</sup>, Satdarshan P. Monga<sup>2,7</sup>, Eric S. Goetzman<sup>6</sup>, Edward V. Prochownik<sup>1,8,9,\*</sup>

1. The Division of Hematology/Oncology, Children's Hospital of Pittsburgh of UPMC, Pittsburgh, PA;
2. The Department of Pathology, The University of Pittsburgh Medical Center, Pittsburgh PA;
3. The Department of Pathology, Children's Hospital of Pittsburgh of UPMC;
4. The Division of Neonatology, Children's Hospital of Pittsburgh of UPMC, Pittsburgh, PA;
5. The Department of Cell Biology, The University of Pittsburgh Medical Center, Pittsburgh PA;
6. The Division of Medical Genetics, Children's Hospital of Pittsburgh of UPMC;
7. The Division of Gastroenterology, Hepatology and Nutrition, Department of Medicine, The University of Pittsburgh Medical Center;
8. The Department of Microbiology and Molecular Genetics, The University of Pittsburgh Medical Center;
9. The University of Pittsburgh Cancer Institute

Running Title: *Coordinated Biosynthetic Pathways in Hepatoblastoma*

\* Address correspondence to: Edward V. Prochownik, MD, PhD, Division of Hematology/Oncology, Children's Hospital of Pittsburgh of UPMC, Rangos Research Center, Room 5124, 4401 Penn Ave., Pittsburgh, PA 15224, Email: procev@chp.edu, Phone: 412-692-6795; Fax 412-692-5228

**Key words:**  $\beta$ -catenin, YAP, metabolism, oxidative phosphorylation, hepatocellular carcinoma

---

## SUPPLEMENTAL FIGURE LEGENDS

**Supplemental Figure S1.** Expression of potential Myc surrogates in WT and KO hepatocytes and HBs. *A*, Transcript levels for the indicated genes was obtained from RNA seq data performed on WT and KO HBs. *B*, Immuno-blotting for the indicated proteins of WT and KO livers (L) and HBs (T)

**Supplemental Figure S2.** Structure and function of ETC complexes in livers and HBs. *A*, Top panel: Representative BNGE of ETC complexes from paired WT and KO livers (L) and HBs (T) stained with Coomassie Blue. Bottom panels: Representative examples of *in situ* enzymatic activities for ETC complexes I, III, IV and V. SC=super-complexes composed of varying stoichiometries of Complexes I, II and IV. *B*, Quantification of relative specific activities of *in situ* enzymatic activities after normalizing to total protein content. N=4-7 samples/group. Note that Complex II assays were performed upon total mitochondrial lysates as *in situ* gel-based assays proved unreliable(1,2).

**Supplemental Figure S3.** Low-magnification transmission electron micrographs of WT and KO livers (L) and HBs (T). *A*, Representative photos (magnification x 10,000) emphasizing the relative paucity of mitochondria (white arrows) in HBs. *B*, Quantification of mitochondrial

number and size in WT livers and tumors.

**Supplemental Figure S4.** RNA seq analysis of differential gene expression in WT and KO HBs. Red=up-regulated; green=down-regulated. The transcripts depicted here represent all those identified with  $q < 0.05$  after correction for false discovery rates.

**Supplemental Figure S5.** Transcripts encoding RPs. The depicted heat map is same as shown in Figure 3B. Absolute levels of expression are included.

**Supplemental Figure S6.** Transcripts encoding proteins involved in the regulation of translation. The depicted heat map is the same as shown in Figure 3A and includes members involved in signaling by eIF2, eIF4, p70S6K and mTOR(3,4). Absolute levels of expression are indicated thus permitting a direct comparison of transcript level differences among WT and KO hepatocytes and HBs. Note the ~11-25-fold down-regulation in both WT and KO HBs of transcripts encoding eIF4EBP3, a negative regulator of pre-initiation complex formation.

**Supplemental Figure S7.** Transcripts encoding glycolytic enzymes. *A*, The depicted heat map is the same as shown in Fig. 3C. Absolute levels of expression are included. *B*, The glycolytic pathway depicting key enzymes encoded by transcripts listed in *A*.

**Supplemental Figure S8.** IPA of the top categories of transcript variation between WT and KO HBs. We have previously shown that several of these pathways, which regulate functions associated with white blood cells, including “granulocyte adhesion and diapedesis” and “leukocyte extravasation signaling” are likely to be up-regulated in KO livers in response to the accumulation of lipids by hepatocytes (1). Excluding these and the already discussed pathways pertaining to protein translation, 8 of the remaining pathways (asterisks) were associated with lipid, sterol and eicosanoid biosynthesis.

**Supplemental Figure S9.** Differential expression of transcripts related to fatty acid biosynthesis. The data are taken from the heat map depicted in Figure 4A with actual levels of expression indicated. ND=not detected.

**Supplemental Figure S10.** Differential expression of transcripts related to FAO. The data are taken from the heat map depicted in Figure 4B with actual levels of expression indicated

**Supplemental Figure S11.** Differential expression of transcripts related to cholesterol biosynthesis. The data are taken from the heat map depicted in Figure 4C with actual levels of expression indicated.

**Supplemental Figure S12.** Reduced conversion of glutamine to  $\alpha$ -ketoglutarate. *A*, In the liver Slc1A5 is the major glutamine transporter, whereas Gls2 and Glud1 catalyze the sequential two step deamination of glutamine to  $\alpha$ -ketoglutarate. Glud1 also catalyzes the conversion of oxaloacetate and pyruvate to  $\alpha$ -ketoglutarate via the actions of Got1/2 and Gpt, respectively. *B*, Transcript levels encoding each of the above-mentioned enzymes in WT and KO livers and HBs. Each bar represents the mean of five individual RNAseq results  $\pm$  1 S.E. *C*, Immunoblots for Gls2 and Glud1 in WT and KO livers and HBs. *D*, The conversion of glutamine to  $\alpha$ -ketoglutarate via the actions of Gls2 and Glud1. Each result was normalized to equivalent protein concentrations.

1. Edmunds, L. R., Otero, P. A., Sharma, L., D'Souza, S., Dolezal, J. M., David, S., Lu, J., Lamm, L., Basantani, M., Zhang, P., Sipula, I. J., Li, L., Zeng, X., Ding, Y., Ding, F., Beck, M. E., Vockley, J., Monga, S. P., Kershaw, E. E., O'Doherty, R. M., Kratz, L. E., Yates, N. A., Goetzman, E. P., Scott, D., Duncan, A. W., and Prochownik, E. V. (2016) Abnormal lipid processing but normal long-term repopulation potential of myc<sup>-/-</sup> hepatocytes. *Oncotarget* **7**, 30379-30395
2. Edmunds, L. R., Sharma, L., Wang, H., Kang, A., d'Souza, S., Lu, J., McLaughlin, M., Dolezal, J. M., Gao, X., Weintraub, S. T., Ding, Y., Zeng, X., Yates, N., and Prochownik, E. V. (2015) c-Myc and AMPK Control Cellular Energy Levels by Cooperatively Regulating Mitochondrial Structure and Function. *PLoS One* **10**, e0134049
3. Klann, E., and Dever, T. E. (2004) Biochemical mechanisms for translational regulation in synaptic plasticity. *Nat. Rev. Neurosci.* **5**, 931-942
4. Livingstone, M., Atas, E., Meller, A., and Sonenberg, N. (2010) Mechanisms governing the control of mRNA translation. *Phys. Biol.* **7**, 021001

**Supplemental Table S1. Antibodies utilized in the current study**

| <b>Antibody</b>             | <b>Species</b> | <b>Vendor and ID no.</b> | <b>Dilution used</b> |
|-----------------------------|----------------|--------------------------|----------------------|
| Myc                         | Rabbit         | Cell Signaling(13987)    | 1:1,000              |
| N-Myc                       | Rabbit         | Santa Cruze(sc791)       | 1:500                |
| L-Myc                       | Rabbit         | Santa Cruze(sc790)       | 1:1,000              |
| AMPK                        | Rabbit         | Cell Signaling (3532)    | 1:1,000              |
| pAMPK (Thr172)              | Rabbit         | Cell Signaling (4188)    | 1:1,000              |
| Histone H3                  | Rabbit         | Cell Signaling (9715)    | 1:1,000              |
| Glutaminase 2               | Rabbit         | Abcam(ab113509)          | 1:1,000              |
| Glutamine dehydrogenase     | Rabbit         | Cell signaling(12793)    | 1:1,000              |
| Acetyl-histone-H3 (K9/K14)  | Rabbit         | Santa Cruz (sc8655-R)    | 1:500                |
| GAPDH                       | Mouse          | Sigma-Aldrich(G8795)     | 1:20,000             |
| HRP anti-mouse              | Horse          | Cell Signaling(7076)     | 1:10,000             |
| HRP anti-ribbit             | Goat           | Cell Signaling(7074)     | 1:5,000              |
| Alexa Fluor 488 anti-rabbit | Goat           | Thermo Fisher(A-11008)   | 1:1,000              |



# Supplemental Fig. S2

## A

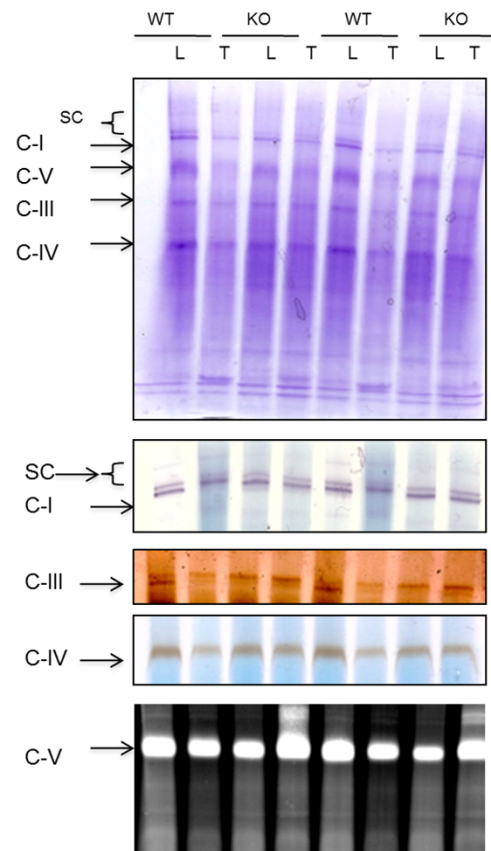

## B

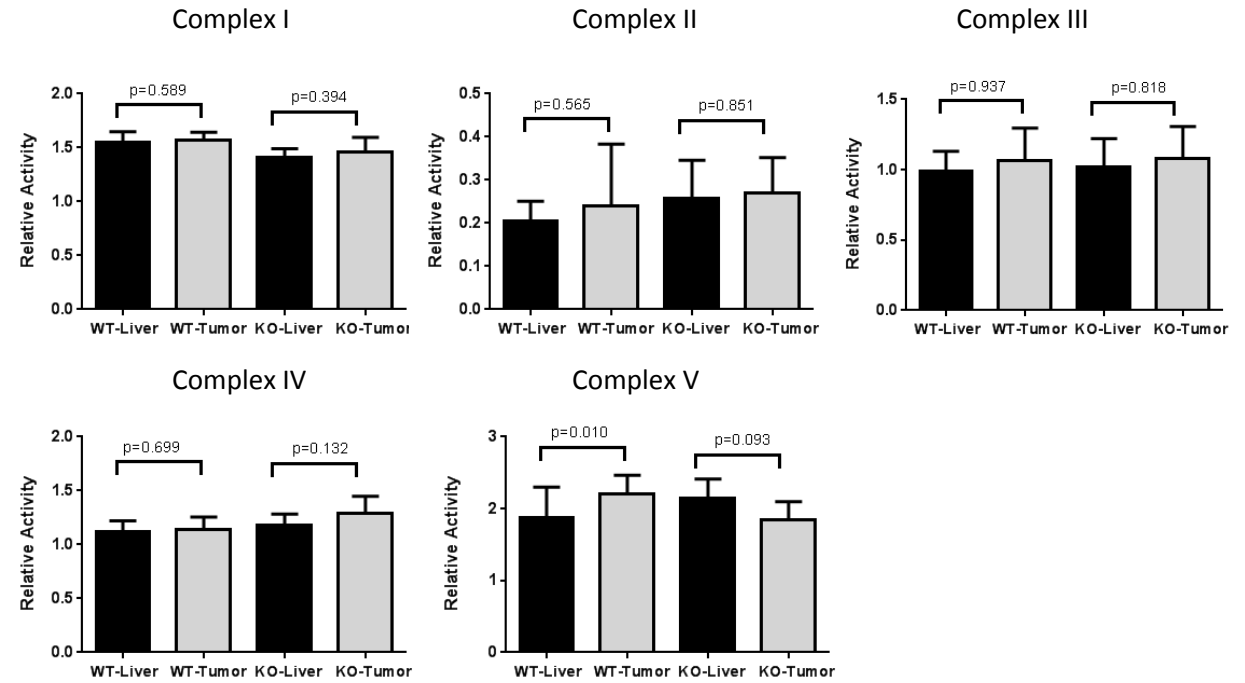

Supplemental Fig. S3

**A**

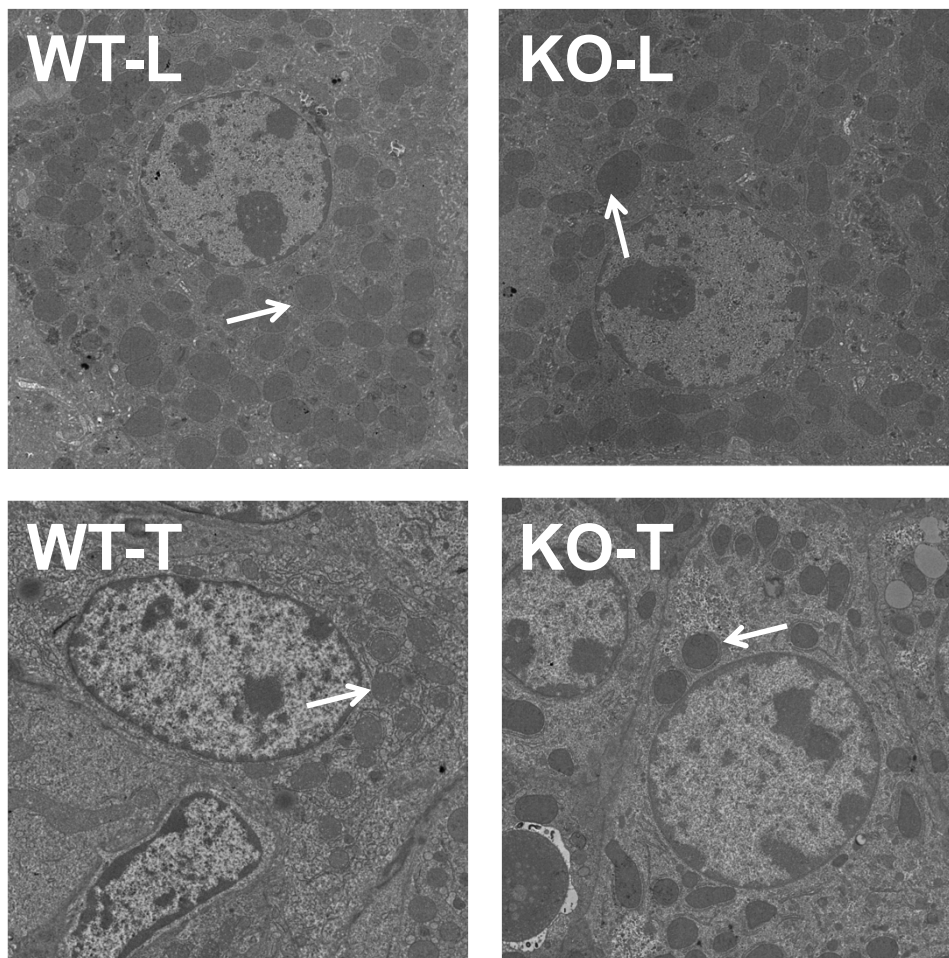

**B**

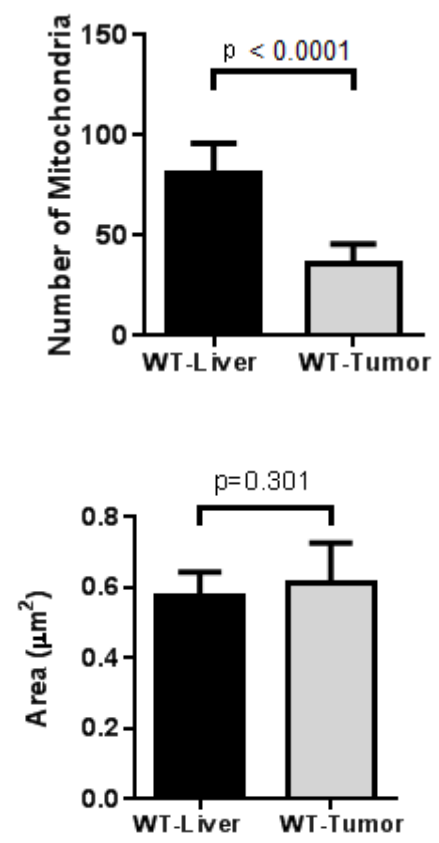

Supplemental Fig. S4

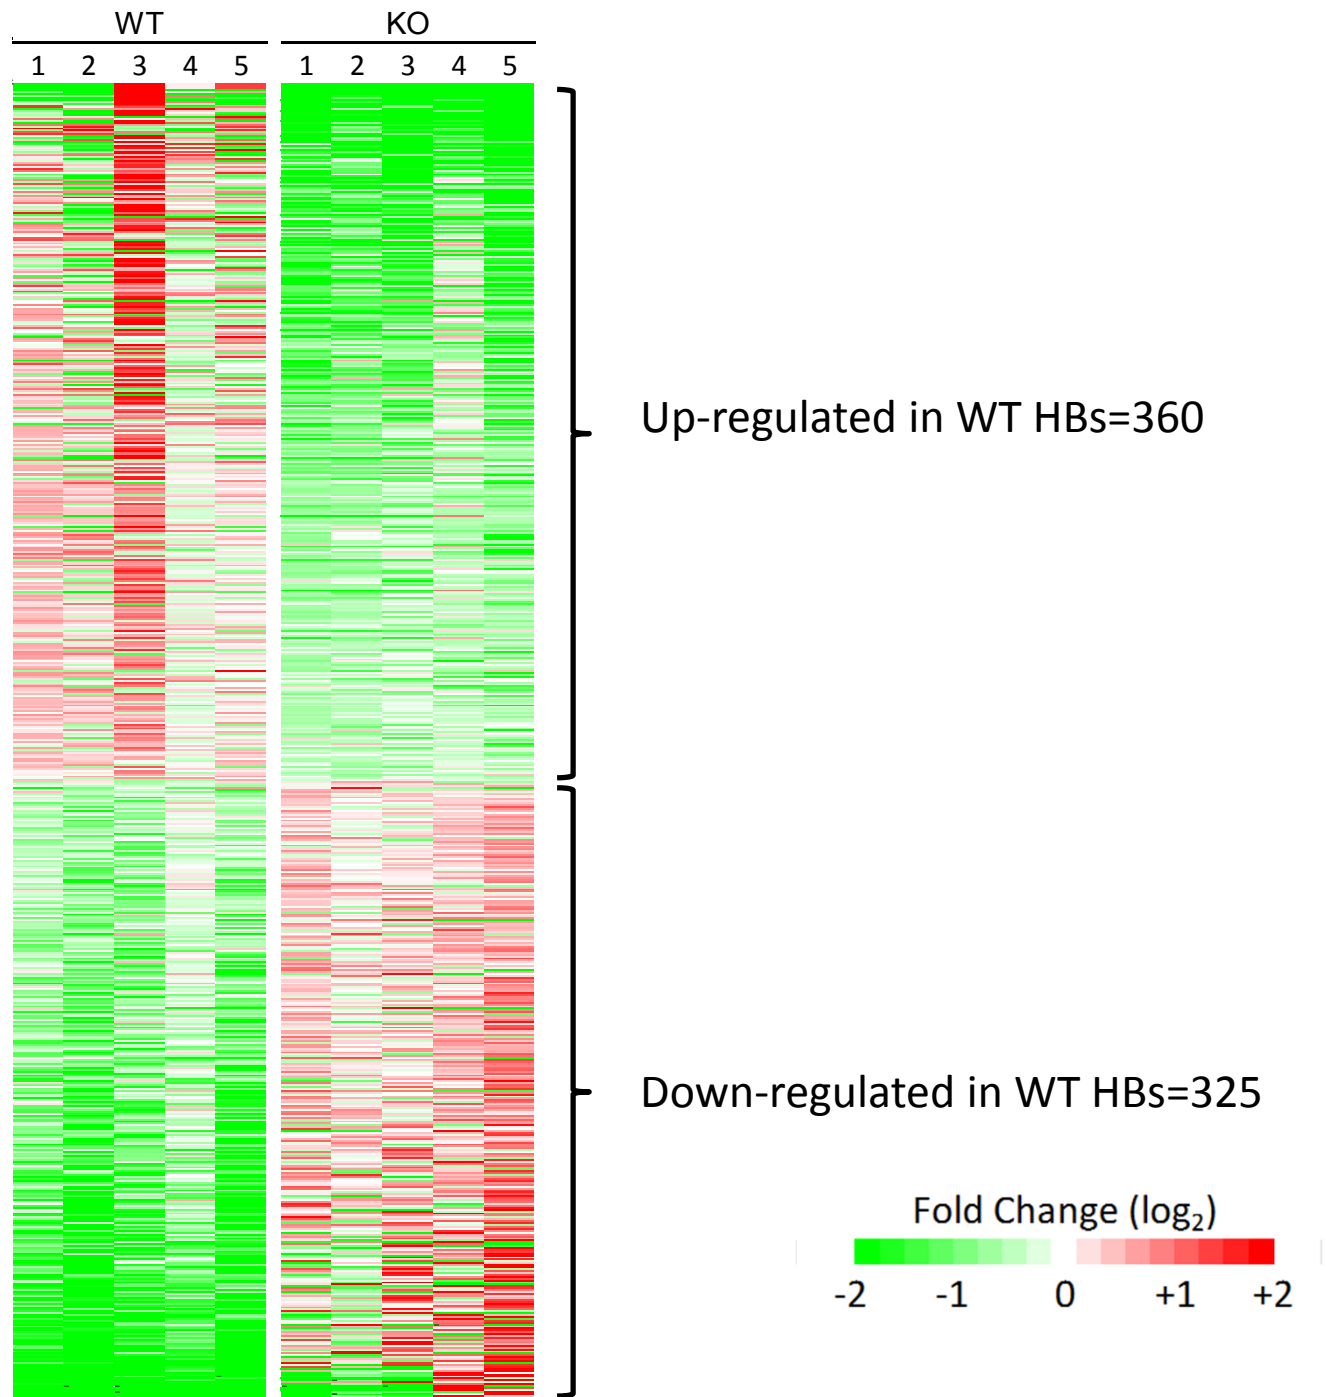





# Supplemental Fig. S6

| Gene ID | Gene Symbol | Tumor vs Hepatocyte |         |           |         | WT vs KO   |         |         |           |         | Hepatocytes |   |    |   | HBs |   |    |   |   |   |   |   |   |   |  |
|---------|-------------|---------------------|---------|-----------|---------|------------|---------|---------|-----------|---------|-------------|---|----|---|-----|---|----|---|---|---|---|---|---|---|--|
|         |             | WT                  |         | KO        |         | Hepatocyte |         | Tumor   |           |         | WT          |   | KO |   | WT  |   | KO |   |   |   |   |   |   |   |  |
|         |             | Log2 Diff           | P value | Log2 Diff | P value | Log2 Diff  | P value | Fold DI | Log2 Diff | P value | 1           | 2 | 3  | 4 | 1   | 2 | 3  | 4 | 5 | 1 | 2 | 3 | 4 | 5 |  |
| 381404  | Pabpc1l     | 5.18419             | 0.0044  | 5.44632   | 0.0014  | -0.487956  | 1       | 0.595   | 1         | 1       |             |   |    |   |     |   |    |   |   |   |   |   |   |   |  |
| 12877   | Cpeb1       | 3.60576             | 0.0006  | 3.86504   | <0.0001 | 0.134924   | 0.57265 | 0.917   | 0.57265   | 0.63645 |             |   |    |   |     |   |    |   |   |   |   |   |   |   |  |
| 66892   | Eif4e3      | 3.30828             | 0.002   | 3.64597   | <0.0001 | -0.318557  | 0.217   | 0.635   | 0.217     | 0.0193  |             |   |    |   |     |   |    |   |   |   |   |   |   |   |  |
| 208691  | Eif5a2      | 3.18944             | 0.0001  | 4.09914   | 0.03338 | 0.789505   | 1       | 0.92    | 1         | 1       |             |   |    |   |     |   |    |   |   |   |   |   |   |   |  |
| 13666   | Eif2ak3     | 2.36478             | 0.0006  | 2.73397   | <0.0001 | 0.051071   | 0.7085  | 0.802   | 0.7085    | 0.1845  |             |   |    |   |     |   |    |   |   |   |   |   |   |   |  |
| 66085   | Eif3f       | 1.83995             | 0.0003  | 1.59386   | 0.0001  | 0.205563   | 0.2084  | 1.368   | 0.2084    | 0.03335 |             |   |    |   |     |   |    |   |   |   |   |   |   |   |  |
| 16418   | Eif6        | 1.7709              | 0.0003  | 1.61567   | 0.0002  | 0.068107   | 0.62815 | 1.167   | 0.62815   | 0.24445 |             |   |    |   |     |   |    |   |   |   |   |   |   |   |  |
| 27103   | Eif2ak4     | 1.66115             | 0.0001  | 1.90368   | <0.0001 | 0.051175   | 0.80485 | 0.876   | 0.80485   | 0.543   |             |   |    |   |     |   |    |   |   |   |   |   |   |   |  |
| 19106   | Eif2ak2     | 1.56325             | 0.0054  | 1.38913   | 0.00022 | -0.22614   | 0.2213  | 0.965   | 0.2213    | 0.9113  |             |   |    |   |     |   |    |   |   |   |   |   |   |   |  |
| 74203   | Eif4enif1   | 1.54449             | 0.0001  | 1.17337   | 0.00031 | -0.035643  | 0.9691  | 1.262   | 0.9691    | 0.5489  |             |   |    |   |     |   |    |   |   |   |   |   |   |   |  |
| 245474  | Dkc1        | 1.45613             | 0.0131  | 1.48565   | 0.00023 | 0.232899   | 0.47105 | 1.151   | 0.47105   | 0.65855 |             |   |    |   |     |   |    |   |   |   |   |   |   |   |  |
| 226982  | Eif5b       | 1.40429             | 0.0001  | 1.38709   | <0.0001 | 0.064316   | 0.65395 | 1.058   | 0.65395   | 0.65185 |             |   |    |   |     |   |    |   |   |   |   |   |   |   |  |
| 67204   | Eif2s2      | 1.308               | 0.0027  | 1.00081   | 0.0005  | 0.086927   | 0.52175 | 1.314   | 0.52175   | 0.0555  |             |   |    |   |     |   |    |   |   |   |   |   |   |   |  |
| 68135   | Eif3h       | 1.2953              | 0.0036  | 0.67602   | 0.00484 | -0.098261  | 0.5891  | 1.435   | 0.5891    | 0.0148  |             |   |    |   |     |   |    |   |   |   |   |   |   |   |  |
| 13685   | Eif4ebp1    | 1.28911             | 0.0042  | 0.73167   | 0.00967 | 0.179898   | 0.23065 | 1.667   | 0.23065   | 0.00075 |             |   |    |   |     |   |    |   |   |   |   |   |   |   |  |
| 56347   | Eif3c       | 1.26837             | 0.0014  | 1.1763    | 0.00023 | 0.051679   | 0.74695 | 1.105   | 0.74695   | 0.4966  |             |   |    |   |     |   |    |   |   |   |   |   |   |   |  |
| 13681   | Eif4a1      | 1.26802             | 0.0001  | 1.07561   | 0.00246 | 0.10727    | 0.4779  | 1.231   | 0.4779    | 0.2294  |             |   |    |   |     |   |    |   |   |   |   |   |   |   |  |
| 98221   | Eif3m       | 1.26096             | 0.0035  | 0.83999   | 0.00085 | 0.044256   | 0.75875 | 1.381   | 0.75875   | 0.0259  |             |   |    |   |     |   |    |   |   |   |   |   |   |   |  |
| 16341   | Eif3e       | 1.14567             | 0.0012  | 0.68289   | 0.00491 | 0.078112   | 0.5846  | 1.455   | 0.5846    | 0.00725 |             |   |    |   |     |   |    |   |   |   |   |   |   |   |  |
| 54196   | Pabpn1      | 1.13078             | 0.0039  | 1.64202   | <0.0001 | 0.514931   | 0.0042  | 1.003   | 0.0042    | 0.9615  |             |   |    |   |     |   |    |   |   |   |   |   |   |   |  |
| 13669   | Eif3a       | 1.12092             | 0.0018  | 1.22362   | 0.00015 | 0.192415   | 0.22535 | 1.064   | 0.22535   | 0.61375 |             |   |    |   |     |   |    |   |   |   |   |   |   |   |  |
| 13665   | Eif2s1      | 1.11395             | 0.0034  | 0.87035   | 0.00404 | -0.076339  | 0.66695 | 1.123   | 0.66695   | 0.30255 |             |   |    |   |     |   |    |   |   |   |   |   |   |   |  |
| 192170  | Eif4a3      | 1.11412             | 0.0004  | 1.16742   | 0.00019 | -0.01933   | 0.84395 | 0.951   | 0.84395   | 0.88675 |             |   |    |   |     |   |    |   |   |   |   |   |   |   |  |
| 229317  | Eif2a       | 1.08897             | 0.0008  | 0.79767   | 0.00077 | 0.134344   | 0.7067  | 1.343   | 0.7067    | 0.50565 |             |   |    |   |     |   |    |   |   |   |   |   |   |   |  |
| 26905   | Eif2s3x     | 1.08087             | 0.0021  | 1.05913   | 0.00081 | 0.087628   | 0.59635 | 1.079   | 0.59635   | 0.5039  |             |   |    |   |     |   |    |   |   |   |   |   |   |   |  |
| 16865   | Eif2d       | 1.07727             | 0.0002  | 1.06373   | 0.00076 | 0.090473   | 0.5123  | 1.075   | 0.5123    | 0.52285 |             |   |    |   |     |   |    |   |   |   |   |   |   |   |  |
| 54709   | Eif3i       | 1.05754             | 0.0035  | 0.37621   | 0.03789 | 0.04637    | 0.72375 | 1.656   | 0.72375   | 0.00075 |             |   |    |   |     |   |    |   |   |   |   |   |   |   |  |
| 20918   | Eif1        | 0.99224             | 0.0004  | 0.731     | 0.01625 | 0.047096   | 0.86015 | 1.238   | 0.86015   | 0.22545 |             |   |    |   |     |   |    |   |   |   |   |   |   |   |  |
| 18458   | Pabpc1      | 0.97786             | 0.001   | 0.87378   | 0.00158 | 0.337305   | 0.03755 | 1.358   | 0.03755   | 0.0565  |             |   |    |   |     |   |    |   |   |   |   |   |   |   |  |
| 217715  | Eif2b2      | 0.94981             | 0.0032  | 0.74883   | 0.00039 | 0.073033   | 0.6451  | 1.209   | 0.6451    | 0.1702  |             |   |    |   |     |   |    |   |   |   |   |   |   |   |  |
| 73830   | Eif3k       | 0.89395             | 0.0135  | 0.50165   | 0.00101 | 0.096759   | 0.5041  | 1.404   | 0.5041    | 0.0168  |             |   |    |   |     |   |    |   |   |   |   |   |   |   |  |
| 53356   | Eif3g       | 0.88924             | 0.0033  | 0.79203   | 0.00031 | 0.099563   | 0.55925 | 1.146   | 0.55925   | 0.29265 |             |   |    |   |     |   |    |   |   |   |   |   |   |   |  |
| 56717   | Mtor        | 0.8912              | 0.0269  | 1.08441   | 0.00038 | 0.157115   | 0.38675 | 0.975   | 0.38675   | 0.89835 |             |   |    |   |     |   |    |   |   |   |   |   |   |   |  |
| 13690   | Eif4g2      | 0.84925             | 0.0098  | 0.99134   | 0.00172 | -0.022613  | 0.86865 | 0.892   | 0.86865   | 0.67695 |             |   |    |   |     |   |    |   |   |   |   |   |   |   |  |
| 22384   | Eif4h       | 0.84096             | 0.0037  | 0.84816   | 0.00018 | -0.011214  | 0.9054  | 0.987   | 0.9054    | 0.9829  |             |   |    |   |     |   |    |   |   |   |   |   |   |   |  |
| 66711   | Sbds        | 0.76935             | 0.0024  | 0.36713   | 0.1107  | -0.083208  | 0.66225 | 1.247   | 0.66225   | 0.10385 |             |   |    |   |     |   |    |   |   |   |   |   |   |   |  |
| 224045  | Eif2b5      | 0.74574             | 0.0009  | 0.66133   | 0.0012  | 0.075137   | 0.64175 | 1.117   | 0.64175   | 0.36885 |             |   |    |   |     |   |    |   |   |   |   |   |   |   |  |
| 13664   | Eif1a       | 0.73861             | 0.0032  | 0.77716   | 0.00181 | 0.168335   | 0.25915 | 1.094   | 0.25915   | 0.4171  |             |   |    |   |     |   |    |   |   |   |   |   |   |   |  |
| 276770  | Eif5a       | 0.68884             | 0.0046  | 0.39079   | 0.05671 | 0.012764   | 0.8643  | 1.24    | 0.8643    | 0.1675  |             |   |    |   |     |   |    |   |   |   |   |   |   |   |  |
| 230721  | Pabpc4      | 0.65381             | 0.015   | 0.31733   | 0.14409 | 0.373499   | 0.0282  | 1.636   | 0.0282    | 0.0012  |             |   |    |   |     |   |    |   |   |   |   |   |   |   |  |
| 26987   | Eif4e2      | 0.63721             | 0.0002  | 0.52102   | 0.00247 | -0.059228  | 0.80365 | 1.04    | 0.80365   | 0.67365 |             |   |    |   |     |   |    |   |   |   |   |   |   |   |  |
| 27979   | Eif3b       | 0.62351             | 0.0087  | 0.65144   | 0.00074 | 0.26852    | 0.08245 | 1.181   | 0.08245   | 0.2347  |             |   |    |   |     |   |    |   |   |   |   |   |   |   |  |
| 223691  | Eif3l       | 0.5532              | 0.0027  | 0.47252   | 0.03367 | 0.006755   | 0.90065 | 1.062   | 0.90065   | 0.56505 |             |   |    |   |     |   |    |   |   |   |   |   |   |   |  |
| 78655   | Eif3j1      | 0.53259             | 0.029   | 0.38252   | 0.07399 | 0.004449   | 0.9396  | 1.113   | 0.9396    | 0.5093  |             |   |    |   |     |   |    |   |   |   |   |   |   |   |  |
| 108067  | Eif2b3      | 0.51112             | 0.0316  | 0.24144   | 0.17994 | 0.193109   | 0.2942  | 1.378   | 0.2942    | 0.0708  |             |   |    |   |     |   |    |   |   |   |   |   |   |   |  |
| 209354  | Eif2b1      | 0.46272             | 0.0191  | 0.37733   | 0.03552 | 0.092252   | 0.5617  | 1.131   | 0.5617    | 0.3859  |             |   |    |   |     |   |    |   |   |   |   |   |   |   |  |
| 13667   | Eif2b4      | 0.46276             | 0.0006  | 0.61481   | 0.0016  | 0.162229   | 0.27765 | 1.007   | 0.27765   | 0.8645  |             |   |    |   |     |   |    |   |   |   |   |   |   |   |  |
| 231207  | Cpeb2       | -0.79246            | 0.0288  | -0.3848   | 0.15123 | 0.250075   | 0.1413  | 0.897   | 0.1413    | 0.601   |             |   |    |   |     |   |    |   |   |   |   |   |   |   |  |
| 108112  | Eif4ebp3    | -3.45449            | 0.0051  | -4.48411  | 0.00885 | -0.045688  | 0.6816  | 1.978   | 0.6816    | 0.00015 |             |   |    |   |     |   |    |   |   |   |   |   |   |   |  |

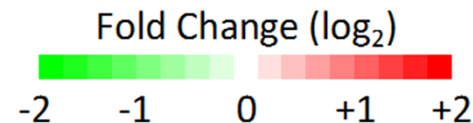

**A**

| Gene ID | Gene Symbol | Tumor vs Hepatocyte |         |           |         | WT vs KO   |         |        |           | Hepatocytes |   |    |   | HBs |   |    |   |   |   |
|---------|-------------|---------------------|---------|-----------|---------|------------|---------|--------|-----------|-------------|---|----|---|-----|---|----|---|---|---|
|         |             | WT                  |         | KO        |         | Hepatocyte |         | Tumor  |           | WT          |   | KO |   | WT  |   | KO |   |   |   |
|         |             | Log2 Diff           | P value | Log2 Diff | P value | Log2 Diff  | P value | Fold D | Log2 Diff | P value     | 1 | 2  | 3 | 4   | 1 | 2  | 3 | 4 | 5 |
| 20525   | SLC2A1      | 1.58506             | 0.1198  | 0.47423   | 0.19863 | -0.20369   | 0.1633  | 2.487  | 0.1633    | 0.00005     |   |    |   |     |   |    |   |   |   |
| 20526   | SLC2A2      | 1.31565             | 0.0258  | 0.51479   | 0.12053 | -0.524995  | 0.0025  | 1.211  | 0.0025    | 0.22935     |   |    |   |     |   |    |   |   |   |
| 20527   | SLC2A3      | 4.85613             | 0.1233  | 4.83753   | 0.00706 | 1.387674   | 1       | 2.651  | 1         | 0.00805     |   |    |   |     |   |    |   |   |   |
| 20528   | SLC2A4      | 6.07493             | 0.0198  | 6.56371   | <0.0001 | 0.619948   | 1       | 1.095  | 1         | 0.78        |   |    |   |     |   |    |   |   |   |
| 15275   | HK1         | 3.63795             | 0.0783  | 2.5991    | 0.02999 | -0.191743  | 1       | 1.799  | 1         | 0.02255     |   |    |   |     |   |    |   |   |   |
| 15277   | HK2         | 5.75422             | 0.045   | 4.49358   | 0.00307 | -0.606021  | 1       | 1.574  | 1         | 0.0651      |   |    |   |     |   |    |   |   |   |
| 212032  | HK3         | 3.03876             | 0.0134  | 3.53789   | 0.01232 | 0.679162   | 1       | 1.133  | 1         | 0.5318      |   |    |   |     |   |    |   |   |   |
| 14751   | GPII        | 1.46372             | 0.0015  | 0.71571   | 0.00077 | 0.150086   | 0.30745 | 1.864  | 0.30745   | 0.0002      |   |    |   |     |   |    |   |   |   |
| 18641   | PFKL        | 2.57103             | 0.0066  | 2.04986   | <0.0001 | 0.131595   | 0.50285 | 1.572  | 0.50285   | 0.0022      |   |    |   |     |   |    |   |   |   |
| 18642   | PFKM        | 0.15914             | 0.5869  | 0.505     | 0.03512 | 0.219948   | 0.3057  | 0.916  | 0.3057    | 0.7656      |   |    |   |     |   |    |   |   |   |
| 56421   | PFKP        | 4.07116             | 0.0243  | 3.0525    | 0.00121 | -0.121706  | 1       | 1.862  | 1         | 0.1705      |   |    |   |     |   |    |   |   |   |
| 11674   | ALDOA       | 1.84761             | 0.0628  | 0.54645   | 0.00773 | 0.121555   | 0.3214  | 2.681  | 0.3214    | 0.00005     |   |    |   |     |   |    |   |   |   |
| 230163  | ALDOB       | -1.16576            | 0.002   | -1.51574  | 0.00099 | -0.20247   | 0.47945 | 1.108  | 0.47945   | 0.6644      |   |    |   |     |   |    |   |   |   |
| 11676   | ALDOC       | 3.64566             | 0.0012  | 2.65665   | <0.0001 | -0.552653  | 0.019   | 1.353  | 0.019     | 0.05335     |   |    |   |     |   |    |   |   |   |
| 14433   | GAPDH       | -0.04584            | 0.8477  | -0.72266  | 0.0124  | -0.019563  | 0.9564  | 1.577  | 0.9564    | 0.0145      |   |    |   |     |   |    |   |   |   |
| 14447   | GAPDHS      | 3.1865              | 0.0059  | 3.77327   | 0.00029 | 0.976888   | 1       | 1.31   | 1         | 0.4964      |   |    |   |     |   |    |   |   |   |
| 18655   | PGK1        | 0.47065             | 0.2311  | -0.47368  | 0.02162 | -0.053085  | 0.7048  | 1.855  | 0.7048    | 0.0003      |   |    |   |     |   |    |   |   |   |
| 12183   | BPGM        | 0.02313             | 0.8975  | -0.0589   | 0.72372 | -0.06457   | 0.77035 | 1.107  | 0.77035   | 0.4815      |   |    |   |     |   |    |   |   |   |
| 18648   | PGAM1       | 0.77814             | 0.0288  | 0.2355    | 0.26493 | 0.063955   | 0.6586  | 1.523  | 0.6586    | 0.0077      |   |    |   |     |   |    |   |   |   |
| 13806   | ENO1        | 0.07807             | 0.853   | -0.592    | 0.11035 | -0.079343  | 0.75145 | 1.506  | 0.75145   | 0.1079      |   |    |   |     |   |    |   |   |   |
| 433182  | ENO1B       | 1.79967             | 0.0014  | 1.13356   | 0.00137 | 0.009521   | 0.81115 | 1.597  | 0.81115   | 0.22245     |   |    |   |     |   |    |   |   |   |
| 13808   | ENO3        | 1.17718             | 0.0213  | 1.61451   | 0.00492 | 0.702704   | 0.0042  | 1.202  | 0.0042    | 0.40945     |   |    |   |     |   |    |   |   |   |
| 18770   | PKLR        | 1.78039             | 0.0679  | 1.09927   | 0.00254 | -0.428274  | 0.00815 | 1.192  | 0.00815   | 0.2756      |   |    |   |     |   |    |   |   |   |
| 18746   | PKM         | 5.48674             | 0.0598  | 3.72967   | 0.00661 | 0.029697   | 0.9775  | 3.45   | 0.9775    | 0.00005     |   |    |   |     |   |    |   |   |   |
| 18597   | PDHA1       | 0.32312             | 0.1644  | 0.158     | 0.46156 | 0.036679   | 0.77515 | 1.15   | 0.77515   | 0.29025     |   |    |   |     |   |    |   |   |   |
| 68263   | PDHB        | -0.13949            | 0.49    | -0.29326  | 0.14184 | -0.059054  | 0.7536  | 1.068  | 0.7536    | 0.5415      |   |    |   |     |   |    |   |   |   |

**B**

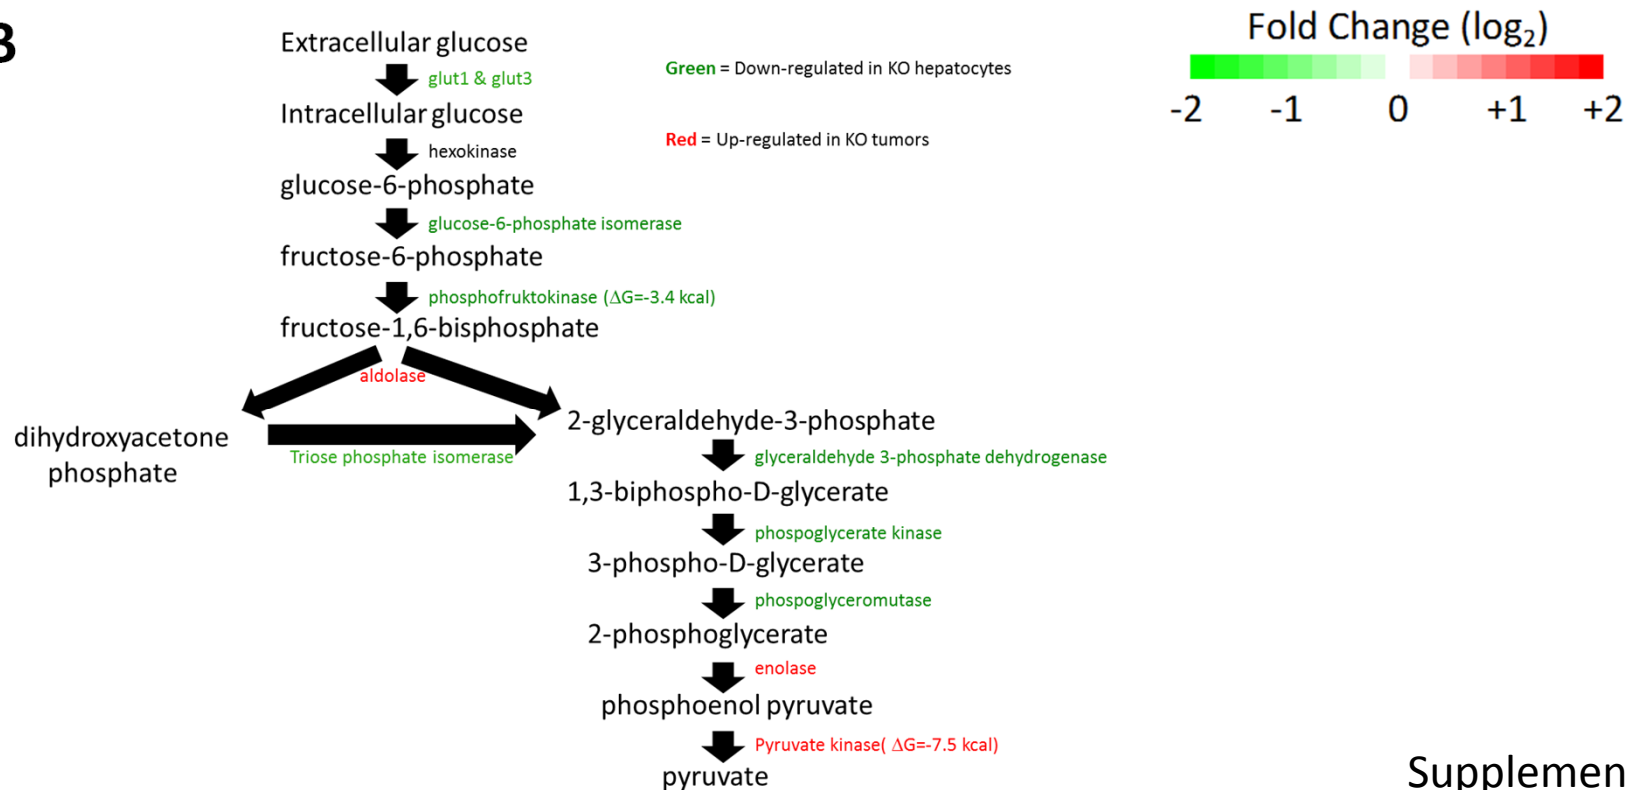

Supplemental Fig. S7

# Supplemental Fig. S8

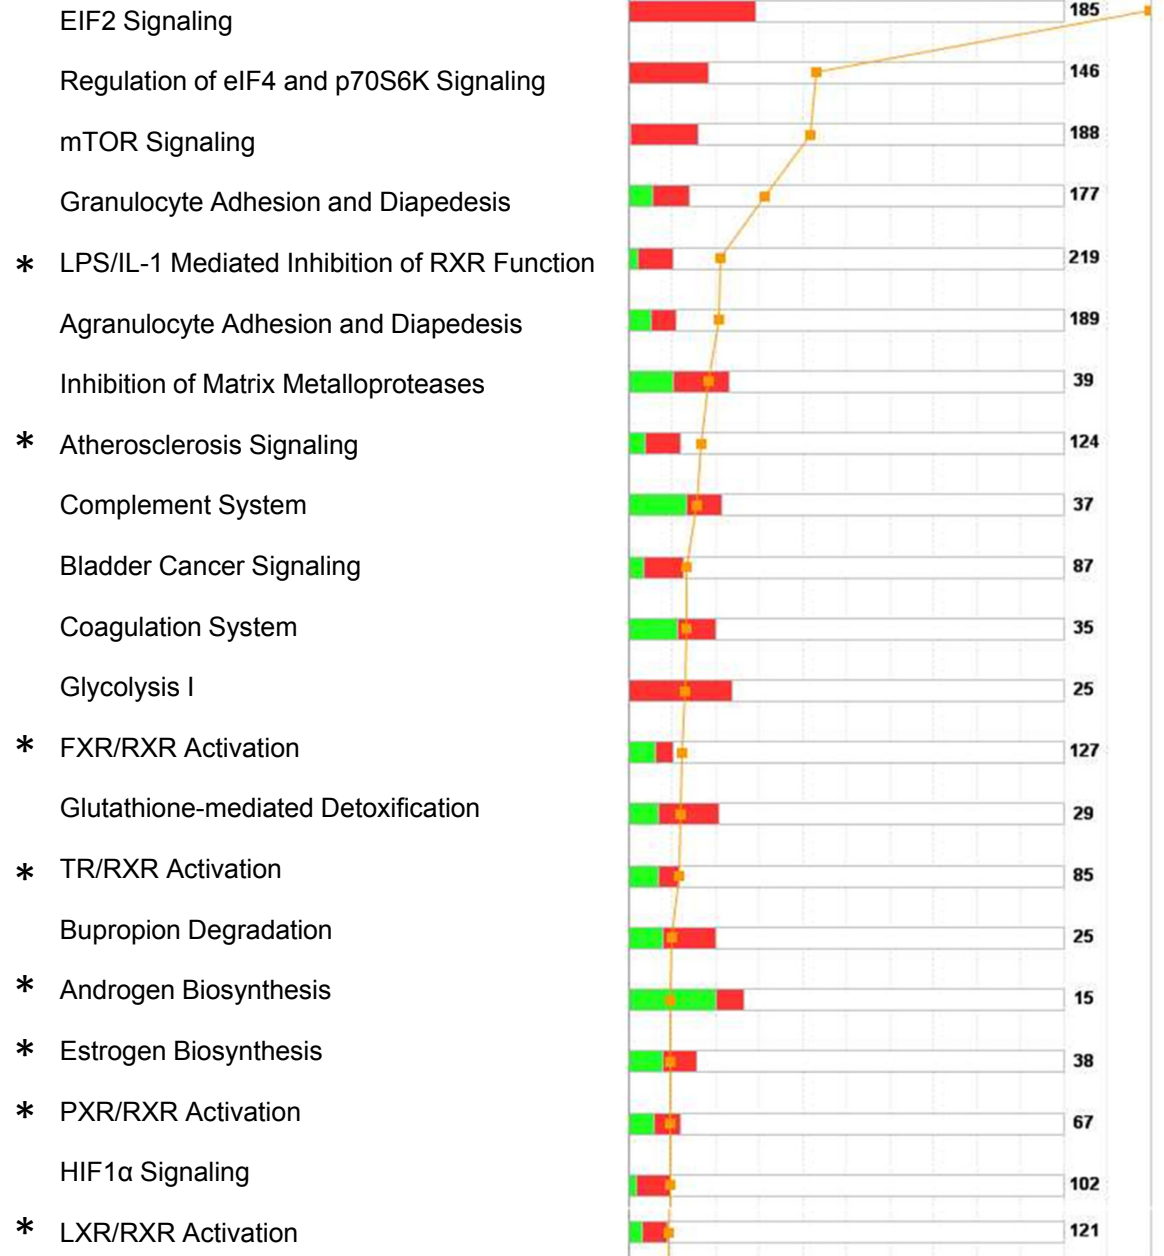

# Supplemental Fig.S9

| Gene ID | Gene Symbol | Tumor vs Hepatocyte |         |           |         | WT vs KO   |         |        |           |         | Hepatocytes |   |    |   | HBs |   |    |   |   |   |   |   |   |   |
|---------|-------------|---------------------|---------|-----------|---------|------------|---------|--------|-----------|---------|-------------|---|----|---|-----|---|----|---|---|---|---|---|---|---|
|         |             | WT                  |         | KO        |         | Hepatocyte |         | Tumor  |           |         | WT          |   | KO |   | WT  |   | KO |   |   |   |   |   |   |   |
|         |             | Log2 Diff           | P value | Log2 Diff | P value | Log2 Diff  | P value | Fold D | Log2 Diff | P value | 1           | 2 | 3  | 4 | 1   | 2 | 3  | 4 | 5 | 1 | 2 | 3 | 4 | 5 |
| 99035   | Olah        | ND                  | 0.0099  | ND        | 0.40708 | ND         | 1       | 1.895  | 1         | 1       |             |   |    |   |     |   |    |   |   |   |   |   |   |   |
| 20250   | Scd2        | 5.35496             | 0.0357  | 6.44417   | 0.32818 | -0.260133  | 1       | 0.392  | 1         | 0.00675 |             |   |    |   |     |   |    |   |   |   |   |   |   |   |
| 14104   | Fasn        | 2.73821             | 0.03    | 2.61305   | 0.00181 | -0.280659  | 0.11165 | 0.898  | 0.11165   | 0.59545 |             |   |    |   |     |   |    |   |   |   |   |   |   |   |
| 107476  | Acaca       | 1.98298             | 0.0341  | 2.11802   | <0.0001 | 0.187243   | 0.21625 | 1.037  | 0.21625   | 0.7744  |             |   |    |   |     |   |    |   |   |   |   |   |   |   |
| 76267   | Fads1       | 1.52696             | 0.0037  | 1.6504    | 0.00061 | -0.238732  | 0.15505 | 0.778  | 0.15505   | 0.2096  |             |   |    |   |     |   |    |   |   |   |   |   |   |   |
| 104112  | Acly        | 1.42411             | 0.0483  | 1.26471   | 0.05286 | -0.500834  | 0.0032  | 0.789  | 0.0032    | 0.2267  |             |   |    |   |     |   |    |   |   |   |   |   |   |   |
| 70757   | Hacd2       | 0.66957             | 0.0055  | 0.85006   | 0.00118 | 0.033325   | 0.8002  | 0.903  | 0.8002    | 0.62485 |             |   |    |   |     |   |    |   |   |   |   |   |   |   |
| 106529  | Tecr        | 0.56436             | 0.0296  | 0.75321   | 0.00332 | -0.047017  | 0.7814  | 0.849  | 0.7814    | 0.354   |             |   |    |   |     |   |    |   |   |   |   |   |   |   |
| 30963   | Hacd1       | 0.39742             | 0.0233  | 0.78949   | 0.0056  | 0.178589   | 0.29595 | 0.862  | 0.29595   | 0.55785 |             |   |    |   |     |   |    |   |   |   |   |   |   |   |

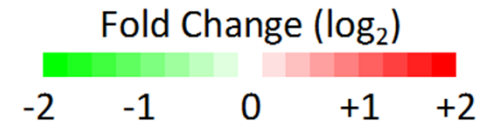





# Supplemental Fig. S12

**A**

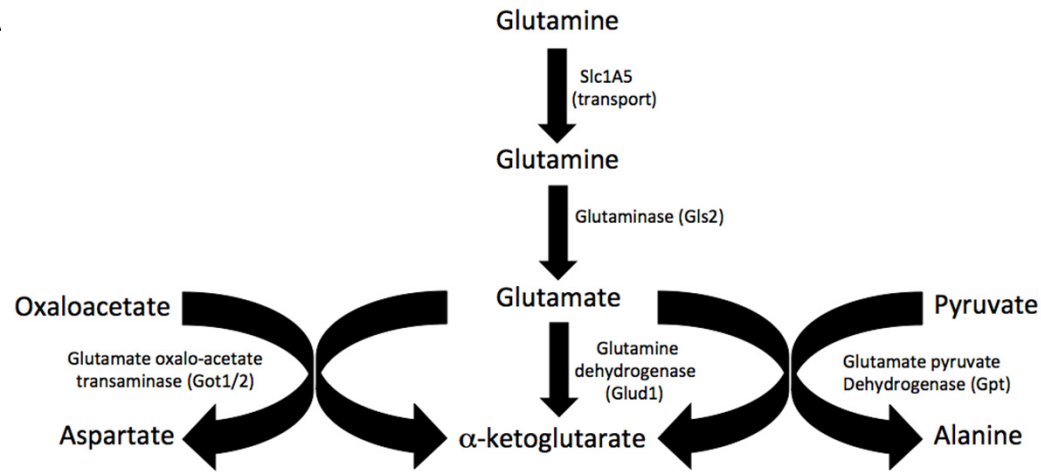

**B**

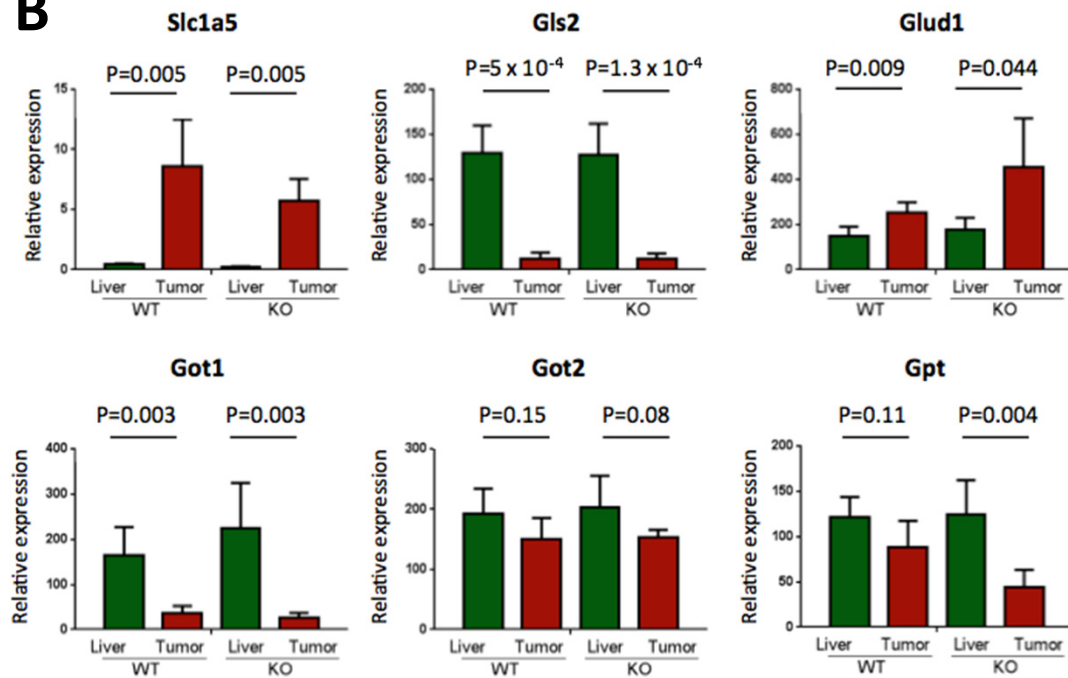

**C**

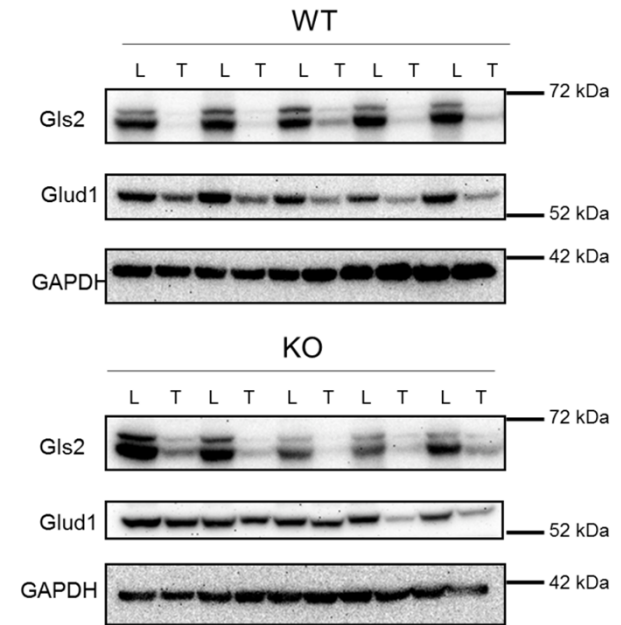

**D**

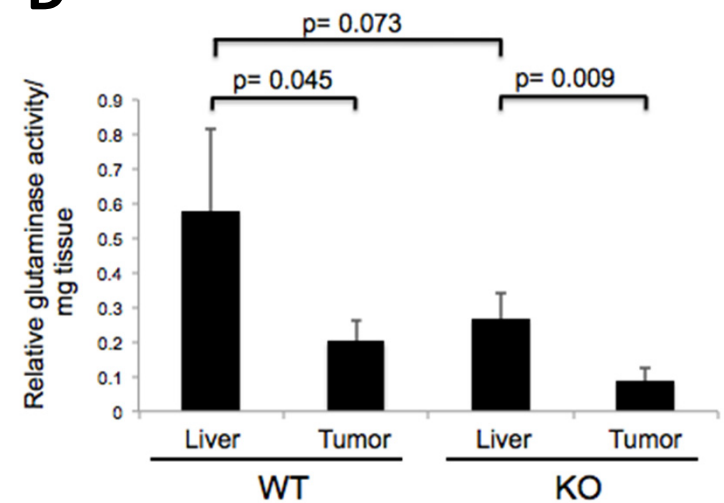

Supplement: supp_M116.754218_suppdata.pdf [file supp_M116.754218_suppdata.pdf]
